# Supplementary material for: Altered protein secretion in Batten disease
Source: PubMed Central journal article supplement (PMC8669491; doi:10.1242/dmm.049152), 2021-12-06
Supplement: dmm-14-049152-s1.pdf [file dmm-14-049152-s1.pdf]

**Table S1.**

[Click here to download Table S1](#)
